# Supplementary material for: An Environmentally Benign Protocol for Aqueous Synthesis of Tetrahydrobenzo[b]Pyrans Catalyzed by Cost-Effective Ionic Liquid
Source: MDPI journal article supplement (doi:10.3390/ijms15046897), 2014-04-22
Supplement: s1 [file s1]

# Supplementary Information

## 1. The pH Values of the Ionic Liquids

The aqueous solution of ChCl based ionic liquids (0.5 mmol/mL) were conducted at the Mettler Toledo pH meter (FE20) at 25 °C. The pH values are listed in Table S1.

**Table S1.** pH values investigations.

| ILs | [Ch][OH] | [Ch][Ac] | [Ch][Pr] | [Ch][Bu] | [Ch][OTf] | [Ch][Lac] |
|-----|----------|----------|----------|----------|-----------|-----------|
| pH  | 12.85    | 7.49     | 7.71     | 7.85     | 7.23      | 7.09      |

## 2. All Spectrums of the Choline Hydroxide Based Ionic Liquids

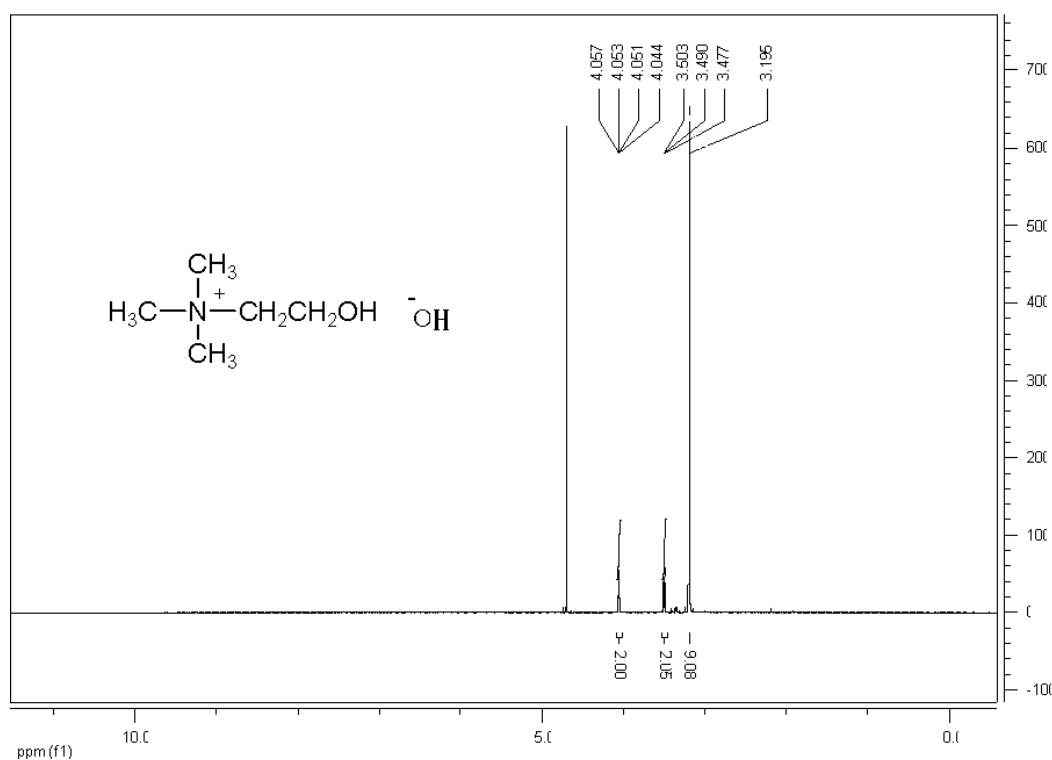

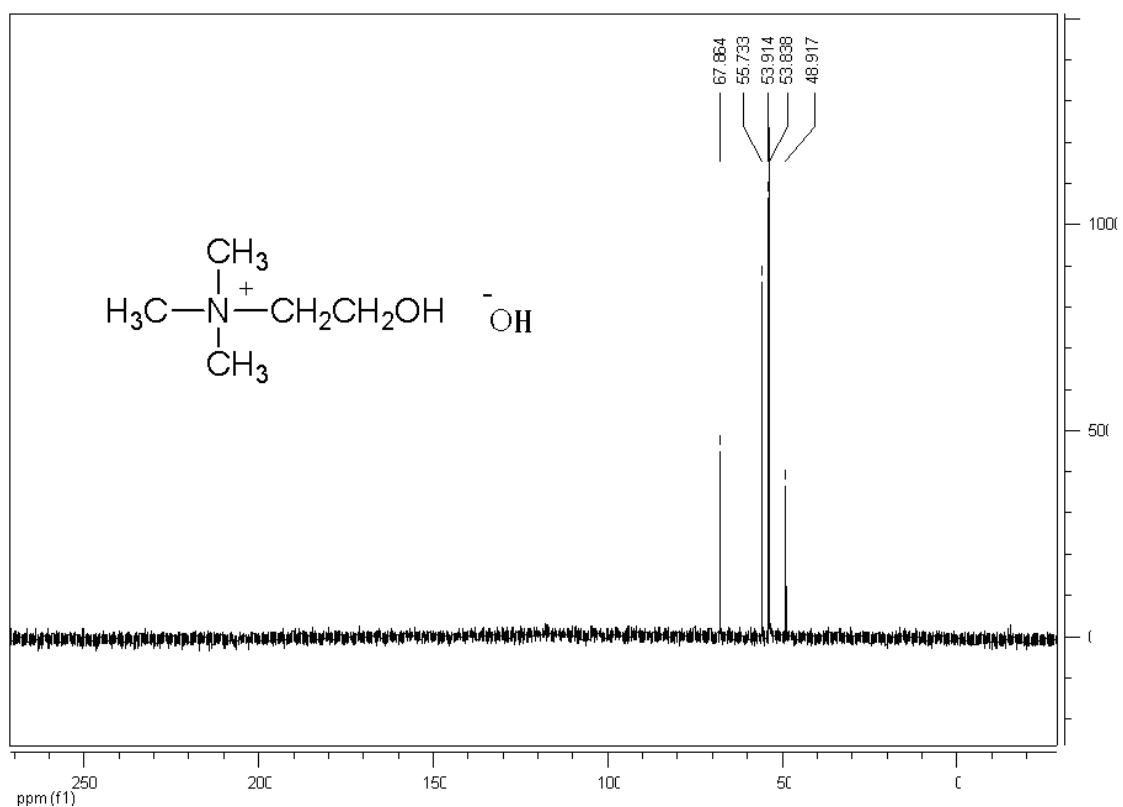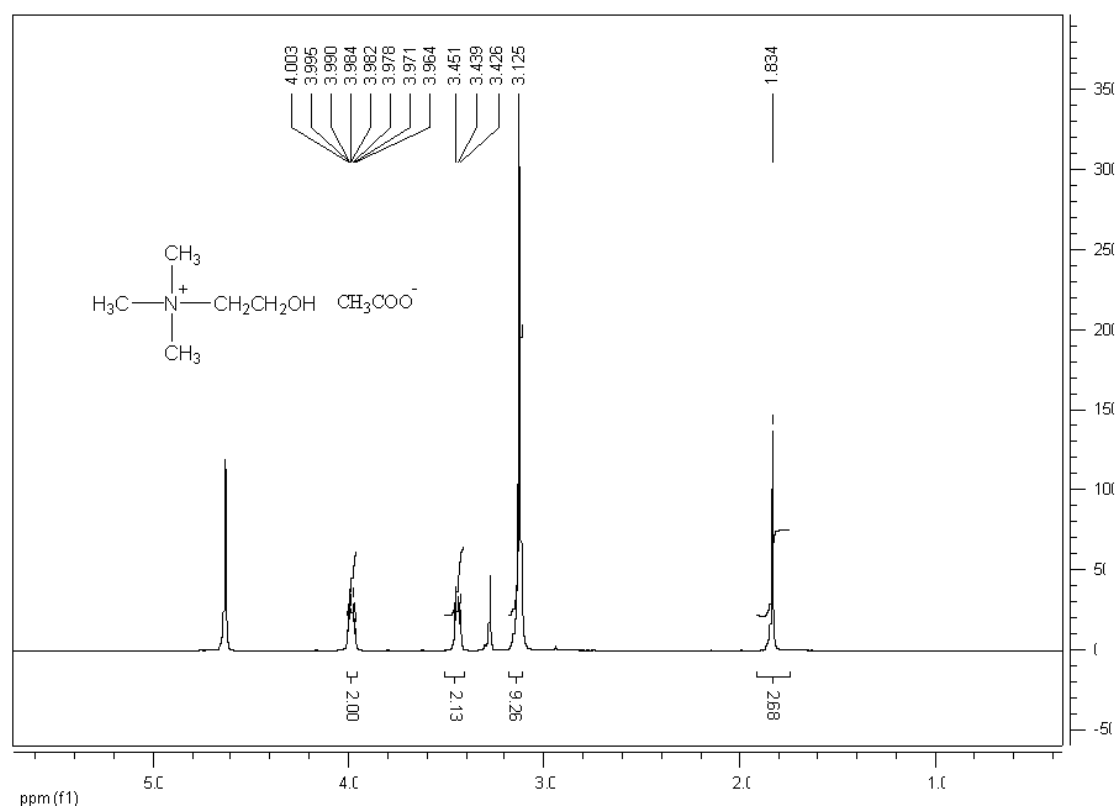

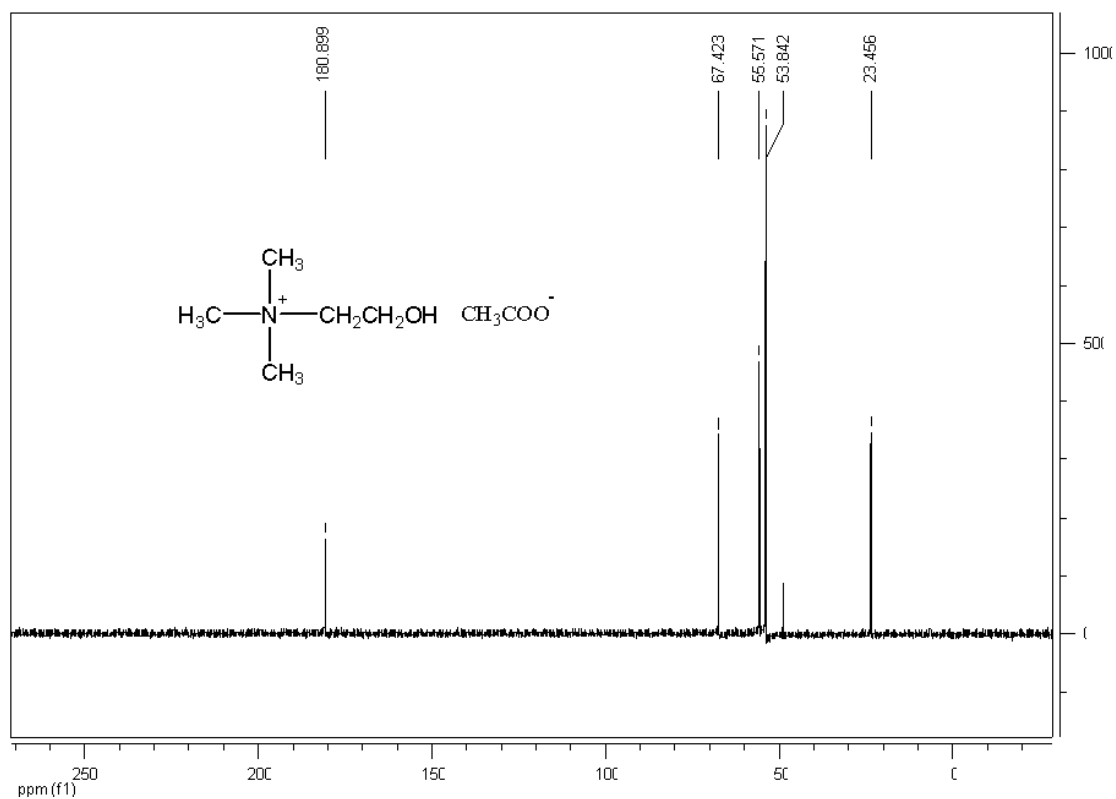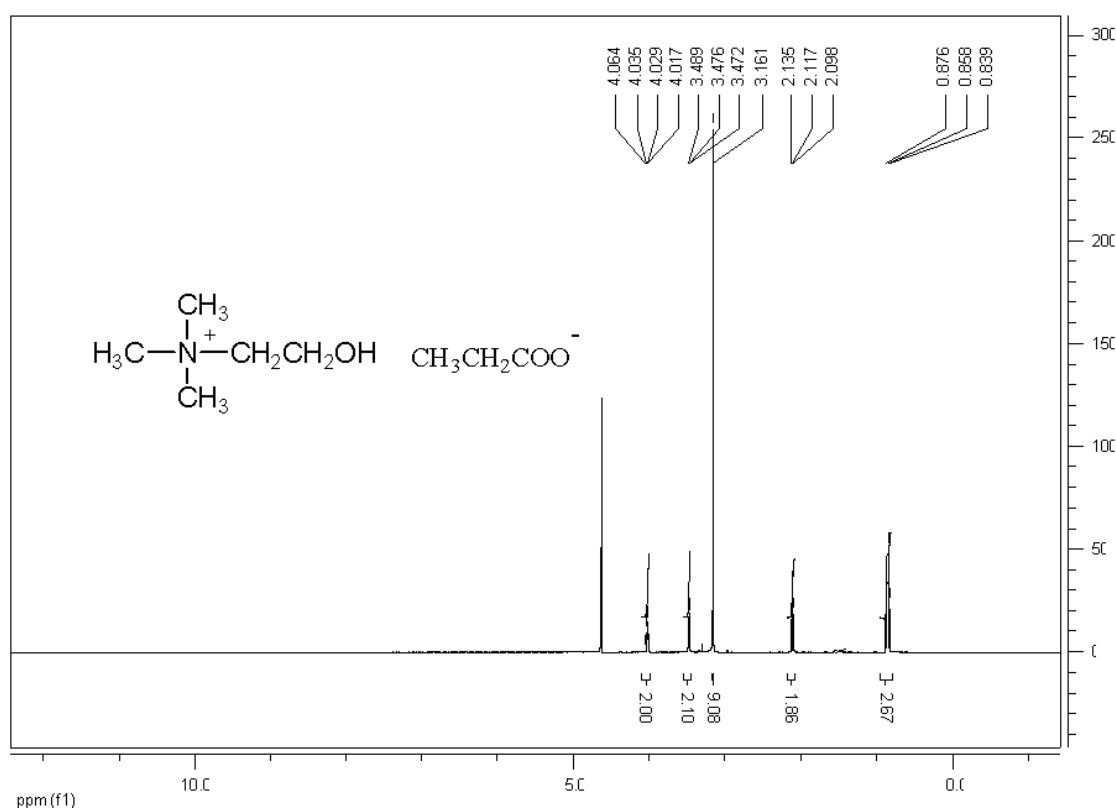

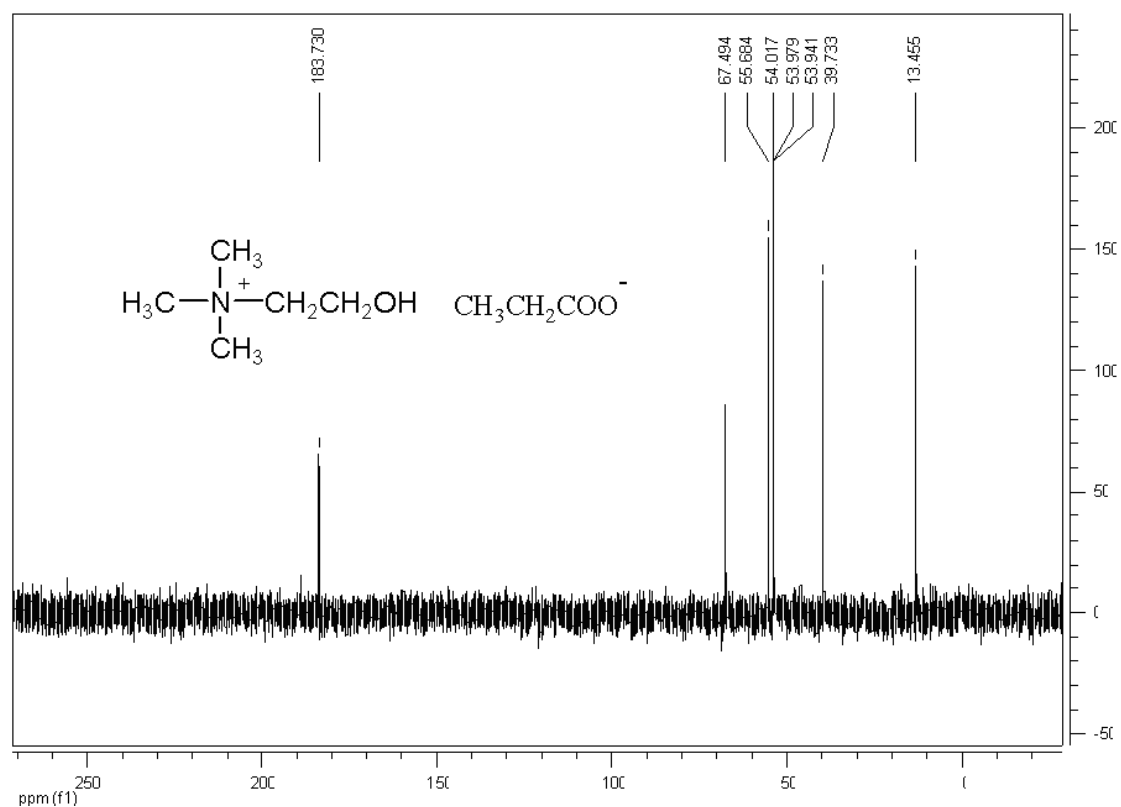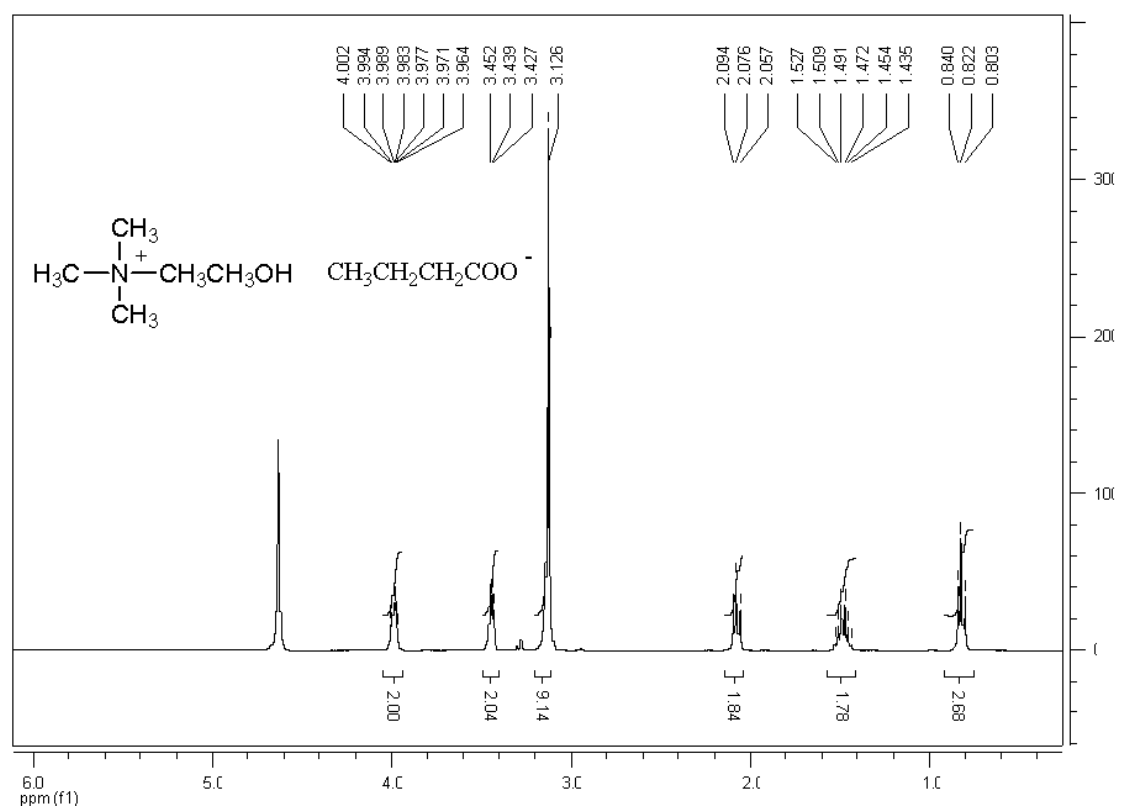

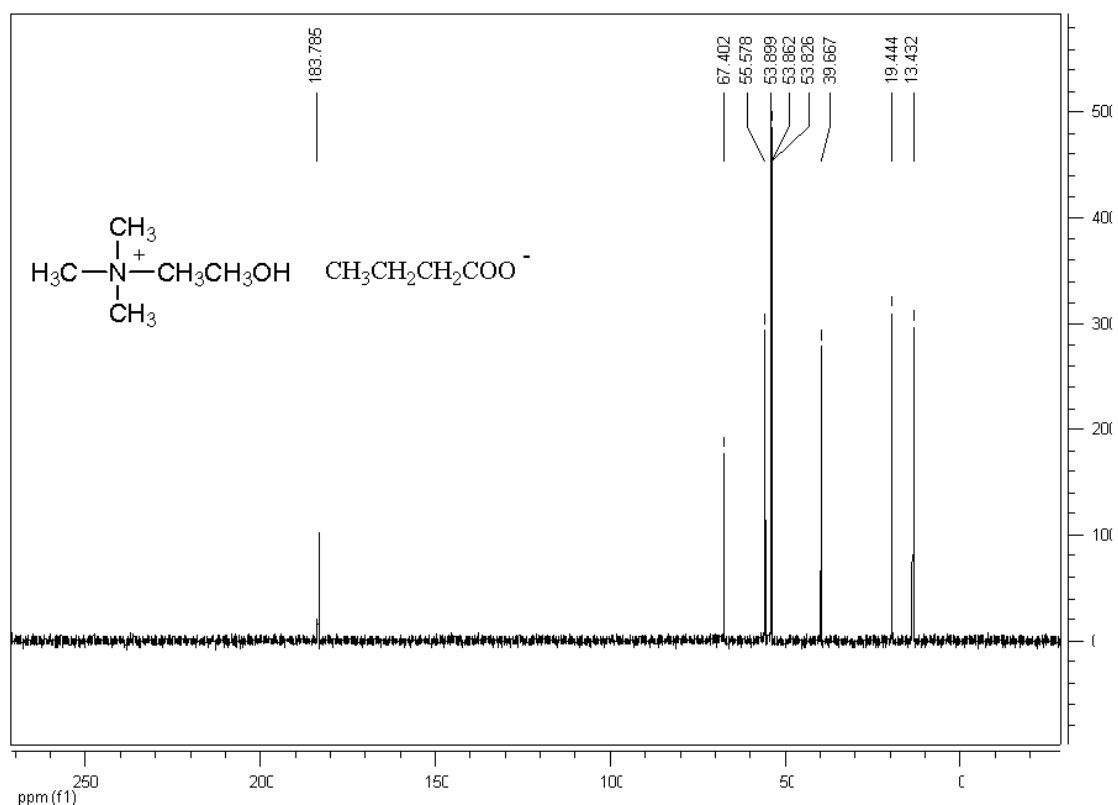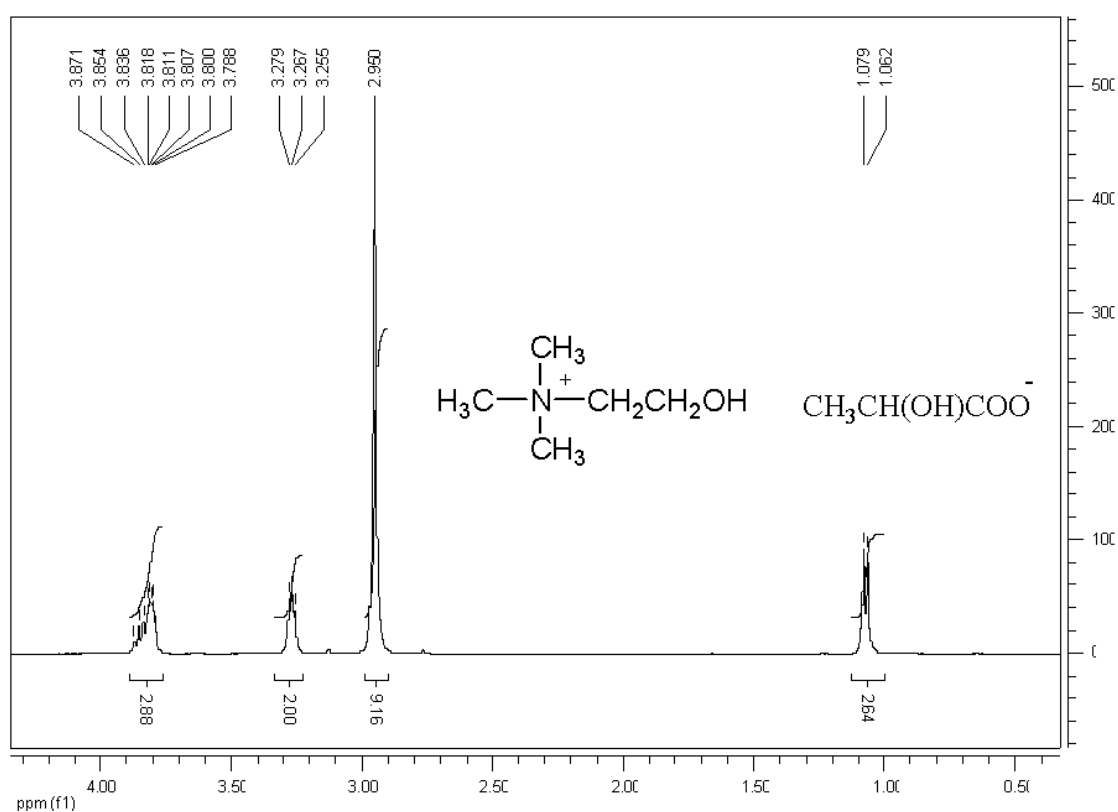

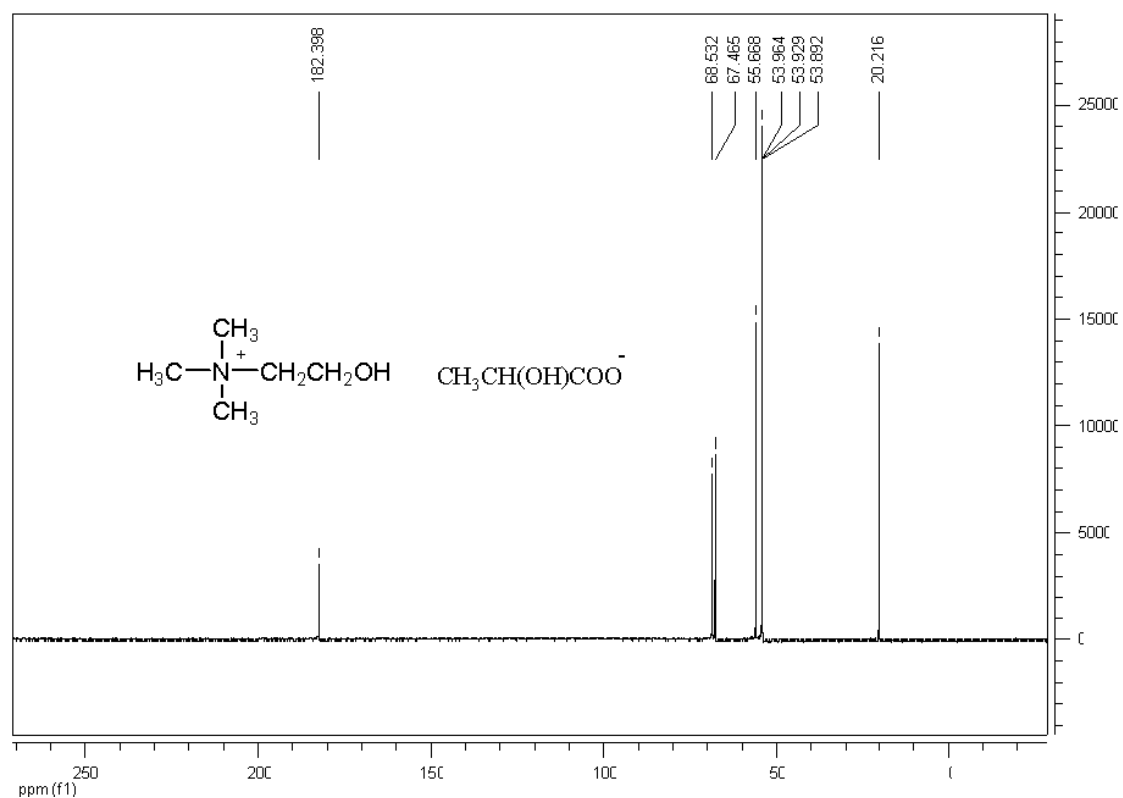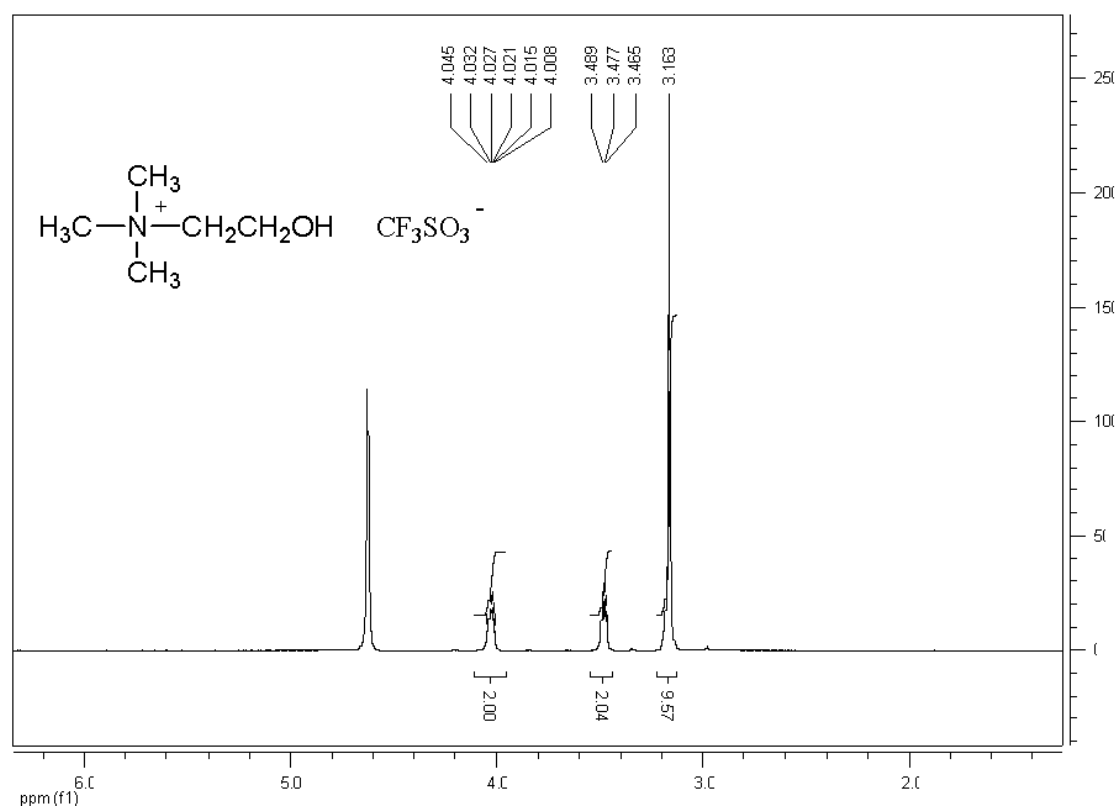

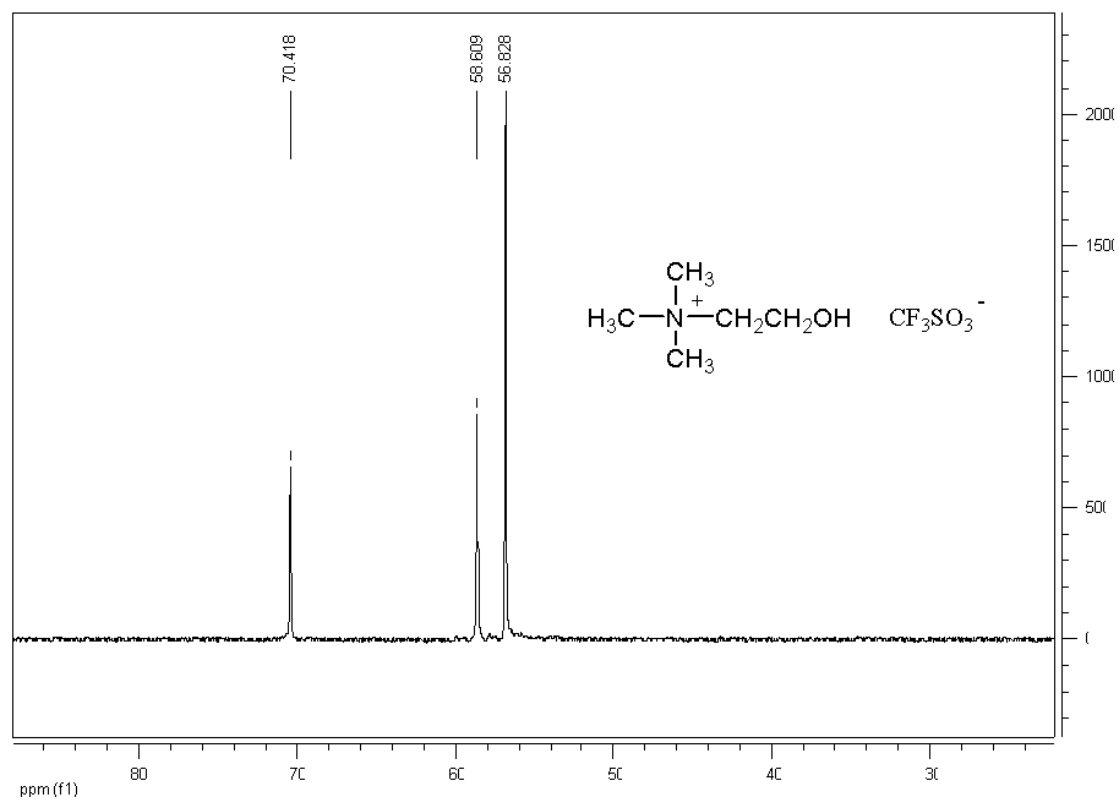

### 3. The Comparison of Two Carbon Spectrums to Confirm the Existence of Hydrogen Bond between Aromatic Aldehyde and Hydroxyl Group at the Side Chain of [Ch][OH]

Figure S1. Carbon spectrum of benzaldehyde in DMSO.

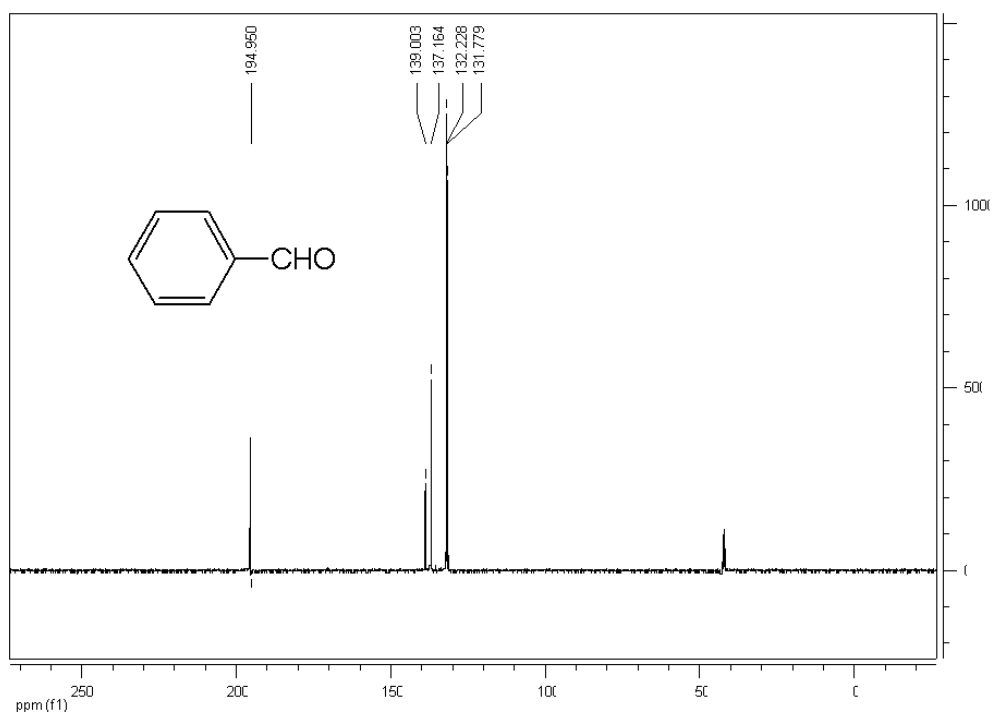

**Figure S2.** Carbon spectrum of the mixture of benzaldehyde and [Ch][OH] in DMSO. It can be observed from Figures 1 and 2 that the chemical shift is changed from 194.99 to 171.79 when equiv [Ch][OH] is added to the benzaldehyde, which shows the existence of the hydrogen bond interaction between carboxyl group of benzaldehyde and hydroxyl group of [Ch][OH].

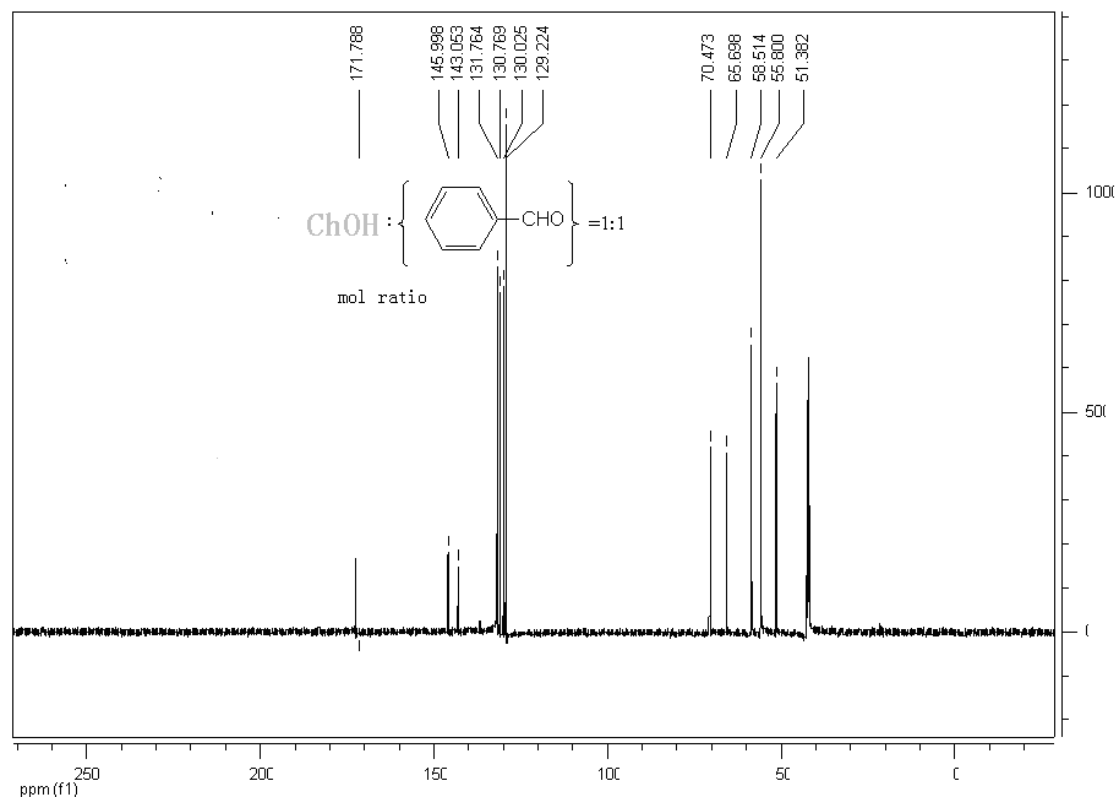

© 2014 by the authors; licensee MDPI, Basel, Switzerland. This article is an open access article distributed under the terms and conditions of the Creative Commons Attribution license (<http://creativecommons.org/licenses/by/3.0/>).
